# Supplementary material for: Myopia progression from wearing first glasses to adult age: the DREAM Study
Source: PubMed Central journal article supplement (PMC9132855; doi:10.1136/bjophthalmol-2020-316234), 2021-01-25
Supplement: bjophthalmol-2020-316234supp001.pdf [file bjophthalmol-2020-316234supp001.pdf]

## Supplementary Table 1: Number of subjects in the analysis

**Total sample N = 2555\***

### Progression

|                              |          |
|------------------------------|----------|
| Under 10 years – 10-12 years | N = 253  |
| 10-12 – 13-15 years          | N = 562  |
| 13-15 – 16-18 years          | N = 729  |
| 16-18 – 19-21 years          | N = 882  |
| 19-21 – 22-25 years          | N = 1270 |

### First myopic prescription and measurement at 22-25 years N = 946

|                              |         |
|------------------------------|---------|
| Under 10 years – 22-25 years | N = 92  |
| 10-12 – 22-25 years          | N = 115 |
| 13-15 – 22-25 years          | N = 133 |
| 16-18 – 22-25 years          | N = 117 |
| 19-21 – 22-25 years          | N = 489 |

### Cumulative risk high myopia

|                |          |
|----------------|----------|
| Under 10 years | N = 279  |
| 10-12 years    | N = 751  |
| 13-15 years    | N = 1083 |

*\* Two orders of myopic eyeglasses with an interval of one year or more until the age of 25 years*
