# Supplementary material for: Myopia progression from wearing first glasses to adult age: the DREAM Study
Source: PubMed Central journal article supplement (PMC9132855; doi:10.1136/bjophthalmol-2020-316234), 2021-01-25
Supplement: bjophthalmol-2020-316234supp002.pdf [file bjophthalmol-2020-316234supp002.pdf]

Supplementary Table 2: Cumulative incidence of high myopia according to spherical equivalent of refraction in diopters per age category.

| Age (years)     | SER                | Subjects (N) | Median survival time (Age, Y [95% CI]) | 5 years survival | 10 years survival |
|-----------------|--------------------|--------------|----------------------------------------|------------------|-------------------|
| <i>Under 10</i> |                    | <i>278</i>   |                                        |                  |                   |
|                 | ≤ -0.5D to ≥ -1.5D | 132          | NR                                     | 95.6 (2.0)       | 85.8 (3.9)        |
|                 | < -1.5D to ≥ -3.0D | 120          | 24.9 (NE)                              | 88.8 (3.6)       | 67.4 (5.4)        |
|                 | < -3.0D to ≥ -4.5D | 23           | 16.0 (12.9 – 19.0)                     | 49.5 (12.3)      | 21.2 (10.7)       |
|                 | < -4.5D to ≥ -6.0D | 3            | 11.2 (10.0 – 12.5)                     | NR               | NR                |
| <i>10 – 12</i>  |                    | <i>751</i>   |                                        |                  |                   |
|                 | ≤ -0.5D to ≥ -1.5D | 285          | NR                                     | 99.0 (0.7)       | 97.0 (1.7)        |
|                 | < -1.5D to ≥ -3.0D | 323          | NR                                     | 96.9 (1.2)       | 85.8 (3.0)        |
|                 | < -3.0D to ≥ -4.5D | 106          | 24.4 (21.7 – 27.1)                     | 80.9 (4.2)       | 55.6 (6.3)        |
|                 | < -4.5D to ≥ -6.0D | 37           | 16.2 (14.3 – 18.0)                     | 40.7 (8.5)       | 17.2 (7.3)        |
| <i>13 – 15</i>  |                    | <i>1083</i>  |                                        |                  |                   |
|                 | ≤ -0.5D to ≥ -1.5D | 371          | NR                                     | 99.0 (1.0)       | 99.0 (1.0)        |
|                 | < -1.5D to ≥ -3.0D | 446          | NR                                     | 100 (NE)         | 88.2 (6.0)        |
|                 | < -3.0D to ≥ -4.5D | 178          | NR                                     | 94.4 (2.1)       | 76.8 (8.1)        |
|                 | < -4.5D to ≥ -6.0D | 88           | 19.9 (18.9 – 20.8)                     | 48.1 (6.1)       | 7.6 (6.3)         |

95% CI = 95% confidence interval

NE = not evaluable

NR = not reached
